# Supplementary material for: A Neurostimulant para-Chloroamphetamine Inhibits the Arginylation Branch of the N-end Rule Pathway
Source: PubMed Central journal article supplement — Sci Rep. 2014 Sep 12;4:6344. doi: 10.1038/srep06344 (PMC4161967; doi:10.1038/srep06344), 2014-09-12

**A Neurostimulant *para*-Chloroamphetamine Inhibits  
the Arginylation Branch of the N-end Rule Pathway**

Yanxialei Jiang, Won Hoon Choi, Jung Hoon Lee, Dong Hoon Han, Ji Hyeon Kim, Young-Shin Jung, Se Hyun Kim, and Min Jae Lee

**SUPPLEMENTARY FIGURE LEGENDS**

**Supplementary Fig. S1.** Chemical Structures of *para*-methoxymethamphetamine (PMMA), *para*-methoxyamphetamine (PMA), and *para*-methylthioamphetamine (PMTA), which have identical phenylisopropylamine backbones as PCA.

**Supplementary Fig. S2.** (A) *In silico* docking analysis between small-molecule inhibitors and the ClpS domain (PBD code: 3DNJ). The chemical structures, binding affinities (Docking, kcal/mol), dissociation constants ( $K_d$ ,  $\mu$ M), and calculated binding modes are shown. A protonated free amino group at the N-terminal residue appears to be essential for the interaction. However, a second residue was identified to be not critical for the inhibitory function. These data complement Fig. 1E. (B) Same as in (A) except that the effect of N-terminal acetylation and the core amide bond on the binding affinities between the ClpS domain and Phe-Ala type 2 dipeptides were calculated.

**Supplementary Fig. S3.** *In silico* docking analysis between small-molecules and the UBR

box from UBR2 (PDB code: 3NY3). The binding affinities (Docking, kcal/mol) and dissociation constants ( $K_d$ ,  $\mu\text{M}$ ) are shown. (A) The N-end rule pathway was highly stereospecific such that Arg-Ala dipeptides with D-conformations had little inhibitory effects while L-Arg-Ala showed stronger interaction with the UBR box than PCA. (B) PCA showed stronger binding affinity and smaller dissociation constants than its derivatives both in the ClpS interaction and UBR box interaction. UBR2 box indicates the UBR box retrieved from UBR2. These data complement Fig. 1F.

**Supplementary Fig. S4.** HEK293-derived stable cell lines expressing Arg/N-end rule model substrates or the control. Similar to the *in vitro* system (Fig. 1A), Met-GFP, generated from Ub-Met-GFP, was long-lived, while Arg- and Phe-GFP proteins were rapidly degraded through the proteasome. Treatment of cells with 10  $\mu\text{M}$  MG132 for 4 hr increased levels of Arg- and Phe-GFP to the comparable levels of Met-GFP. No additive or synergistic effects were observed when 1  $\mu\text{M}$  of PS341 were added with 10  $\mu\text{M}$  MG132.

**Supplementary Fig. S5.** PCA does not affect endogenous levels of RGS4 in *ATE1*<sup>-/-</sup> MEFs. In *ATE1*<sup>-/-</sup> MEFs, unlike +/+ MEFs, RGS4 proteins were long-lived and the levels of endogenous RGS4 were not changed by PCA (0, 50, 100, 200, 500  $\mu\text{M}$ ) treatment. These data complement Fig. 3F and 3G.

**Supplementary Fig. S6.** The Arg/N-end rule pathway is highly active in the brain and the neural tube. (A) When monitored by  $\beta$ -galactosidase activity, the LacZ reporter gene integrated into the targeted ATE1 allele was prominently expressed in the brain and the neural tube in embryos before E.13.5. (B) Histological sections with X-gal staining indicated

strong expression of ATE1 in the neural tube.

**Supplementary Fig. S7.** *ATE1* homozygous mutant mouse brains at E13.5 and E14.5 showed strikingly elevated levels of RGS4 compared to wild-type littermates. *ATE1*<sup>+/-</sup> heterozygous mice, which were virtually identical to wild-type mice in terms of gross morphology, showed no effects on RGS4 levels, indicating the haplosufficiency of ATE1 on RGS4 degradation. These data complement Fig. 5B.

**Supplementary Fig. S8.** Total RNA from the frontal cortex (A) and the hippocampus (B) was subjected to microarray, identifying PCA-target genes which are downregulated. PCA was intraperitoneally injected at 10 mg/kg and 20 mg/kg dose once per day for three days while saline was used as control. Mice were sacrificed 6 hr after the third PCA injection, and brains were extracted to prepare protein or mRNA samples. Gene ontology analysis was performed using DAVID. Fold changes are log base 2.  $P < 0.005$ . (C) Quantitative RT-PCR was performed using primers for indicated genes and GAPDH (control for normalization). The values plotted are means of three independent experiments. A value of  $P < 0.05$  was accepted as statistically significant. \*,  $P < 0.05$ . \*\*,  $P < 0.01$ .

# Supplementary Fig. 1

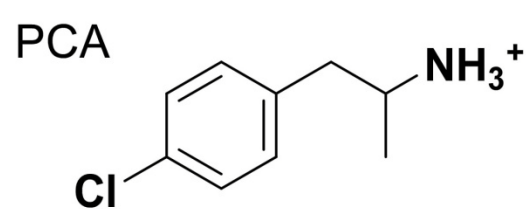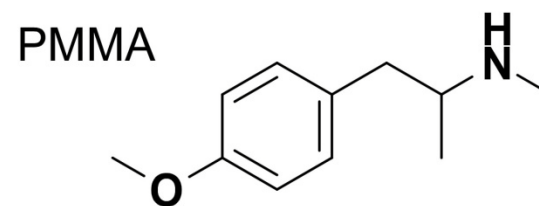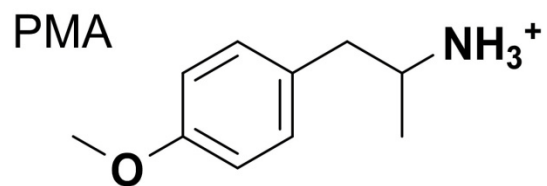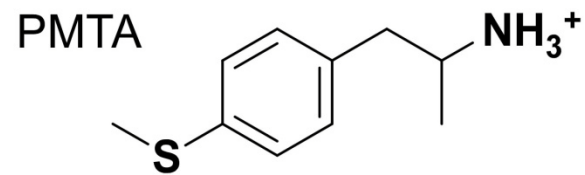

# Supplementary Fig. 2

**A**

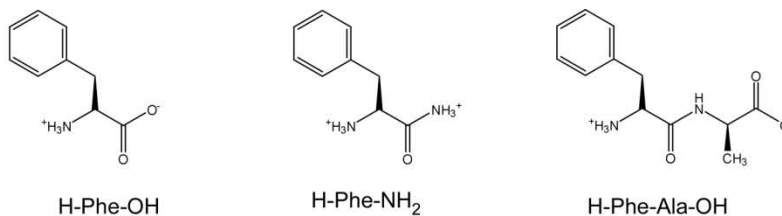

| Peptides              | Docking | K <sub>d</sub> , docking |
|-----------------------|---------|--------------------------|
| H-Phe-NH <sub>2</sub> | -5.37   | 115.71                   |
| H-Phe-OH              | -3.90   | 1183.5                   |
| H-Phe-Ala-OH          | -5.18   | 159.47                   |

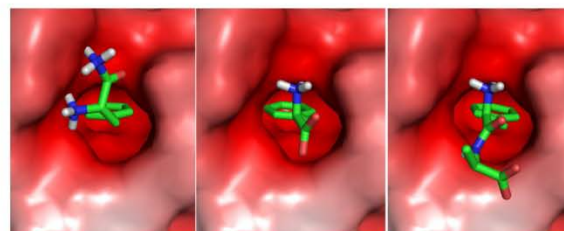

**B**

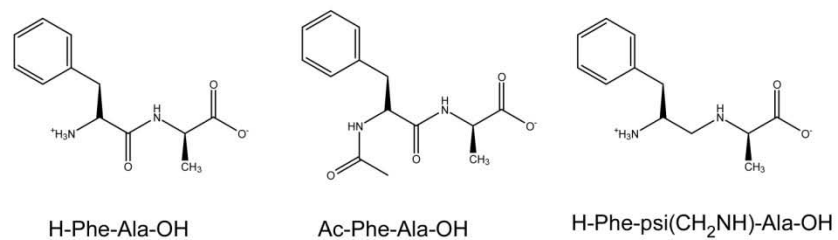

| Peptides                             | Docking | K <sub>d</sub> , docking |
|--------------------------------------|---------|--------------------------|
| H-Phe-Ala-OH                         | -5.18   | 159.47                   |
| Ac-Phe-Ala-OH                        | -4.86   | 273.67                   |
| H-Phe-psi(CH <sub>2</sub> NH)-Ala-OH | -4.48   | 519.76                   |

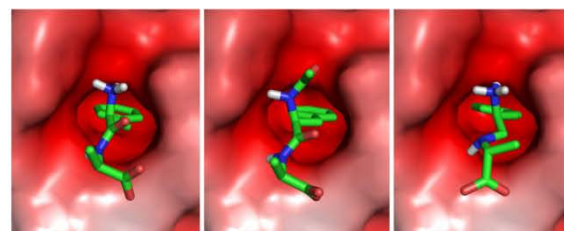

# Supplementary Fig. 3

A

| <b>Peptides</b> | <b>docking</b> | <b>K<sub>d</sub>, docking</b> |
|-----------------|----------------|-------------------------------|
| L-Arg-Ala-OH    | -8.03          | 0.24                          |
| D-Arg-Ala-OH    | -6.27          | 28.50                         |
| PCA             | -7.17          | 5.54                          |

B

| <b>Compound</b> | <b>UBR2 box</b> |                               |
|-----------------|-----------------|-------------------------------|
|                 | <b>docking</b>  | <b>K<sub>d</sub>, docking</b> |
| PCA             | -7.17           | 5.54                          |
| PMMA            | -6.22           | 27.56                         |
| PMA             | -6.24           | 26.64                         |
| PMTA            | -6.21           | 28.03                         |

# Supplementary Fig. 4

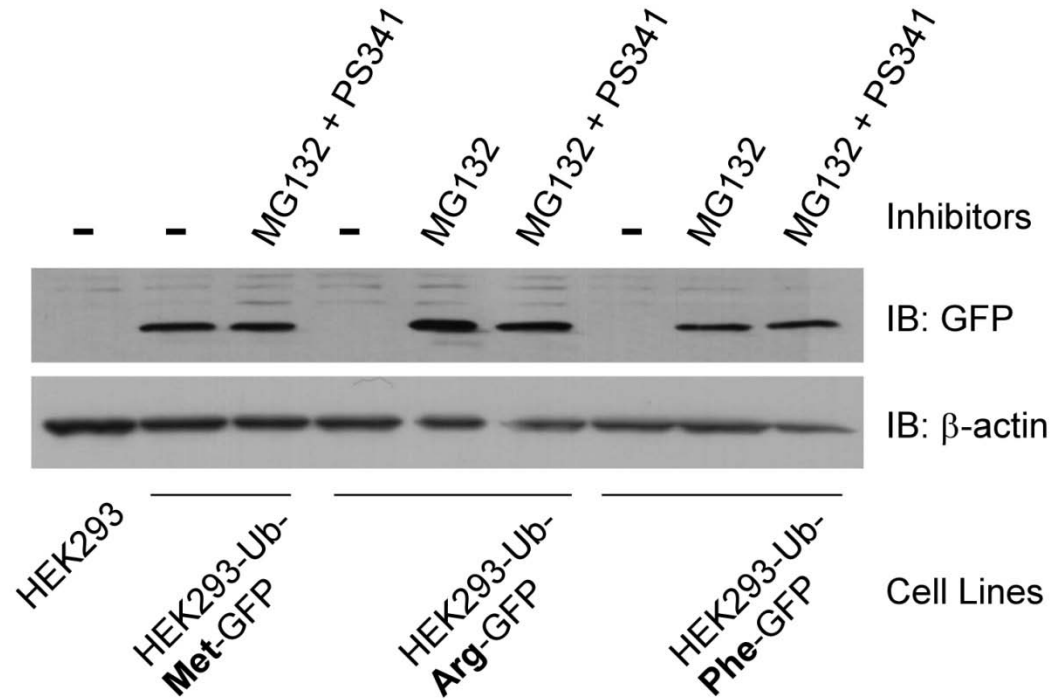

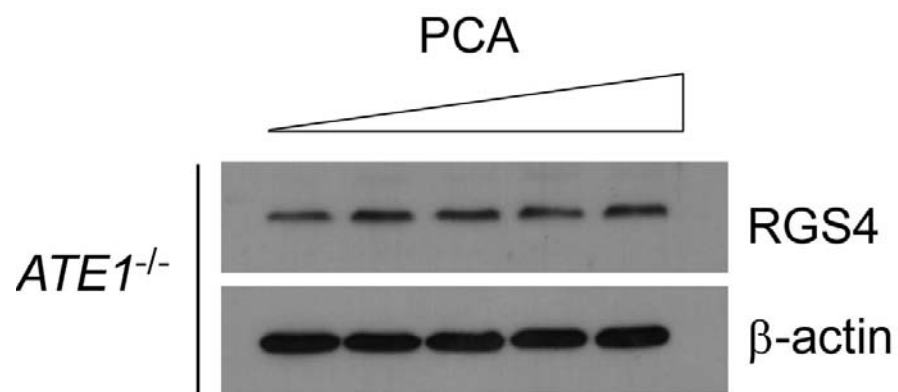



# Supplementary Fig. 6

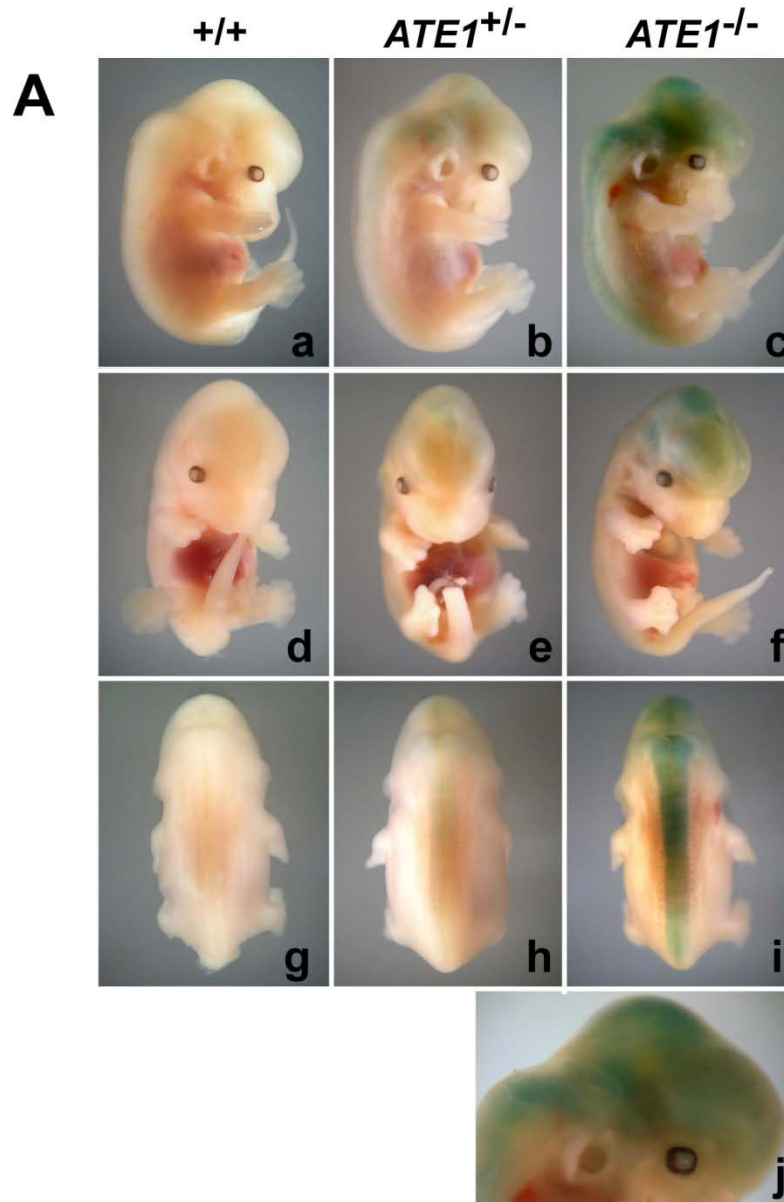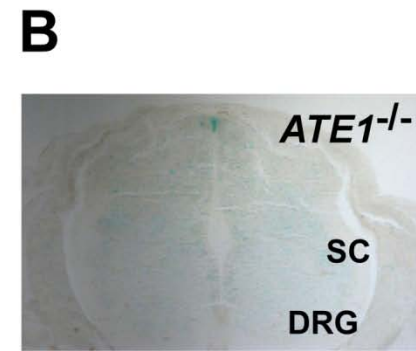

# Supplementary Fig. 7

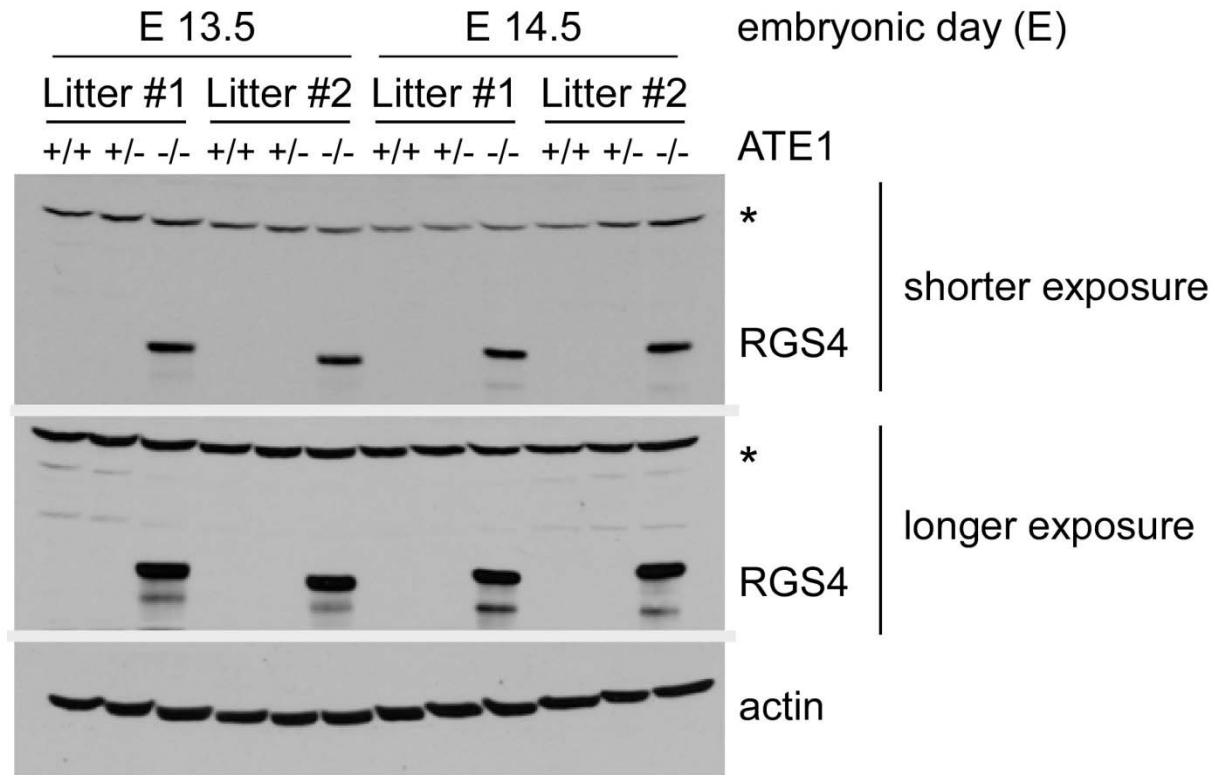

# Supplementary Fig. 8A

## A Frontal Cortex

| Gene         | Fold Inductions | Functions                                                           |
|--------------|-----------------|---------------------------------------------------------------------|
| Pvrl3        | 0.67            | membrane, cell adhesion, signal peptide                             |
| Agpat3       | 0.66            | membrane                                                            |
| Rassf3       | 0.66            | cytoskeleton                                                        |
| Nme2         | 0.65            | nucleotide-binding, membrane, regulation of apoptosis/proliferation |
| Sfrs5        | 0.65            | regulation of transcription                                         |
| Cirbp        | 0.65            | nucleotide binding                                                  |
| Ly86         | 0.63            | signal peptide                                                      |
| Stmn4        | 0.63            | undefined                                                           |
| Cxx1c        | 0.63            | undefined                                                           |
| Hes5         | 0.62            | regulation of transcription, cell adhesion, neuron differentiation  |
| Ggt7         | 0.61            | membrane                                                            |
| Def8         | 0.61            | metal ion-binding                                                   |
| Zfp316       | 0.61            | regulation of transcription, metal ion-binding                      |
| Zc3h13       | 0.59            | metal ion-binding                                                   |
| C1qf2        | 0.51            | signal peptide                                                      |
| LOC100043257 | 0.45            | undefined                                                           |

| Gene          | Fold Inductions | Functions                                                               |
|---------------|-----------------|-------------------------------------------------------------------------|
| Zic3          | 0.67            | regulation of transcription, metal ion-binding                          |
| Eef2          | 0.66            | nucleotide-binding                                                      |
| Rapgef4       | 0.66            | small GTPase mediated signal transduction                               |
| Rasgrp1       | 0.66            | small GTPase mediated signal transduction, metal ion-binding            |
| Mapk1         | 0.66            | kinase, regulation of transcription, vascular smooth muscle contraction |
| Mtch1         | 0.66            | membrane, transport                                                     |
| Kl            | 0.66            | membrane, signal peptide                                                |
| Gm129         | 0.65            | undefined                                                               |
| Ppp1cb        | 0.65            | vascular smooth muscle contraction, metal ion-binding                   |
| Sumo3         | 0.65            | ubl conjugation                                                         |
| Zic4          | 0.65            | transcription factor, metal ion-binding                                 |
| Eef2          | 0.65            | nucleotide-binding                                                      |
| Slc6a15       | 0.65            | transport                                                               |
| Gdi1          | 0.65            | small GTPase mediated signal transduction                               |
| Prkcd         | 0.65            | kinase, regulation of transcription, vascular smooth muscle contraction |
| Atp6ap2       | 0.65            | signal peptide, membrane                                                |
| Mog           | 0.64            | signal peptide, membrane                                                |
| Pfkip         | 0.64            | nucleotide-binding, metal-binding                                       |
| Necap1        | 0.64            | transport                                                               |
| Ctsa          | 0.64            | signal peptide                                                          |
| Ppp1cb        | 0.64            | metal ion-binding, vascular smooth muscle contraction                   |
| Avpr1a        | 0.64            | vascular smooth muscle contraction, chemical homeostasis                |
| Zfp316        | 0.64            | regulation of transcription, metal ion-binding                          |
| Sh3gl2        | 0.64            | membrane                                                                |
| Hnrnpk        | 0.64            | DNA-binding, ubl conjugation                                            |
| Npas4         | 0.63            | regulation of transcription                                             |
| Mbp           | 0.63            | chemical homeostasis                                                    |
| Calml4        | 0.63            | metal ion-binding                                                       |
| Rbbp7         | 0.63            | regulation of transcription                                             |
| Vat1l         | 0.62            | metal ion-binding                                                       |
| Pnpo          | 0.62            | nucleotide-binding                                                      |
| Sfrs5         | 0.61            | regulation of transcription                                             |
| Erdr1         | 0.61            | undefined                                                               |
| Sulf1         | 0.61            | metal ion-binding, signal peptide                                       |
| Cplx2         | 0.61            | transport                                                               |
| Slc4a2        | 0.61            | transport                                                               |
| Egr4          | 0.61            | regulation of transcription                                             |
| Atp6ap2       | 0.60            | signal peptide                                                          |
| Fos           | 0.60            | regulation of transcription                                             |
| Clic6         | 0.60            | transport                                                               |
| Trpm3         | 0.59            | transport                                                               |
| Hspa8         | 0.59            | vesicle, nucleotide-binding                                             |
| Fus           | 0.58            | regulation of transcription                                             |
| Atp6ap2       | 0.58            | membrane, signal peptide                                                |
| Sfrs5         | 0.55            | regulation of transcription                                             |
| Otx2          | 0.55            | regulation of transcription                                             |
| Prir          | 0.55            | signal peptide                                                          |
| Egr2          | 0.54            | regulation of transcription                                             |
| Enpp2         | 0.53            | metal ion-binding, signal peptide                                       |
| Gpm6a         | 0.51            | membrane                                                                |
| D830030K20Rik | 0.49            | undefined                                                               |
| Wfdc2         | 0.45            | signal peptide                                                          |
| Zic1          | 0.43            | regulation of transcription, metal ion-binding                          |
| Isl1          | 0.41            | regulation of transcription, forebrain development                      |
| LOC100043257  | 0.41            | undefined                                                               |
| 1500015O10Rik | 0.41            | signal peptide                                                          |
| Zc3h13        | 0.41            | metal ion-binding                                                       |

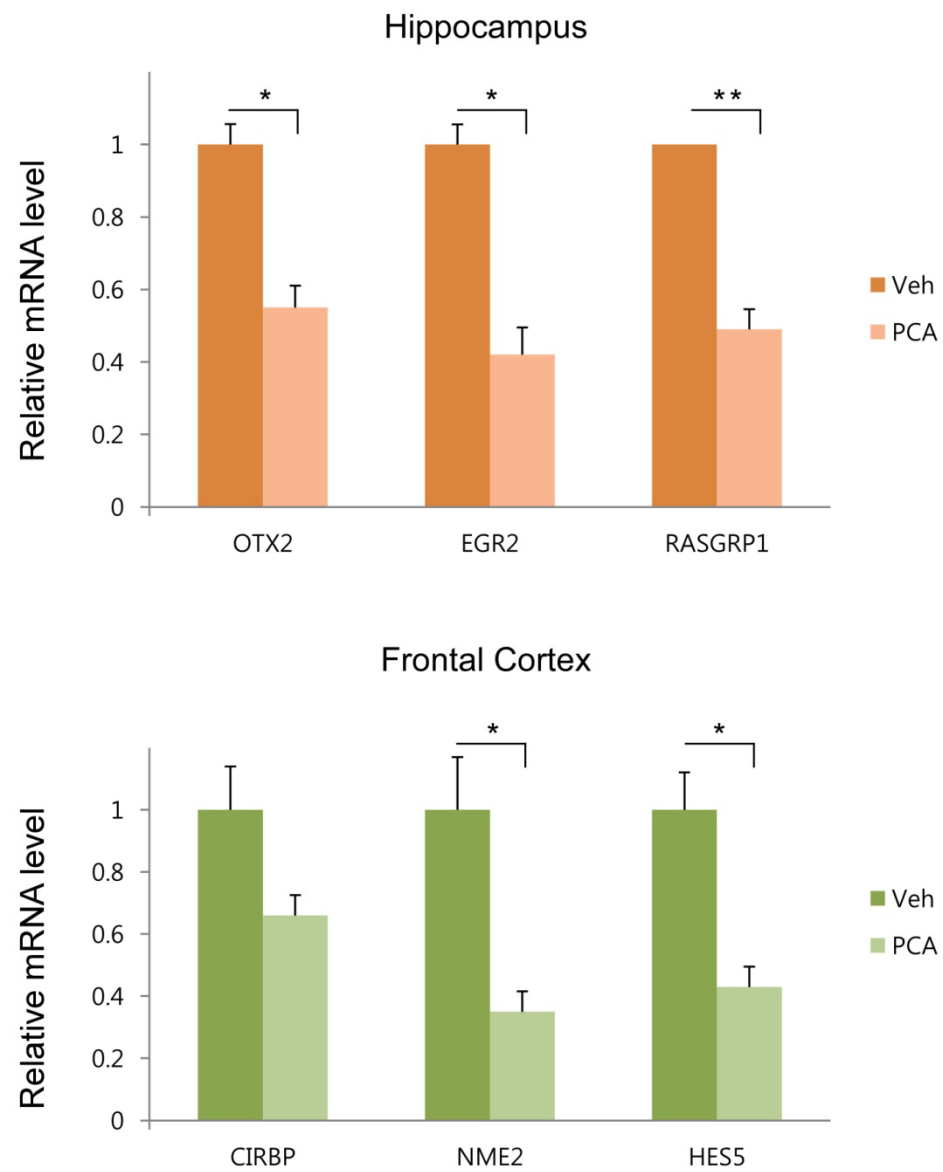

Supplement: srep06344-s1.pdf [file srep06344-s1.pdf]
